# Supplementary material for: High-fat diet promotes type 2 diabetes mellitus by disrupting gut microbial rhythms and short-chain fatty acid synthesis
Source: Royal Society of Chemistry journal article supplement (doi:10.1039/d4fo02957g), 2024-01-01
Supplement: d4fo02957g1.pdf [file d4fo02957g1.pdf]

1 **Table S1 Compositions of diet**

| Diet                   | Basic feed                          | High-fat feed |
|------------------------|-------------------------------------|---------------|
|                        | Energy composition (%)              |               |
| Carbohydrate           | 63.9%                               | 35%           |
| Protein                | 20.3%                               | 20%           |
| Fat                    | 15.8%                               | 45%           |
|                        | Composition of raw materials (g/kg) |               |
| Casein                 | 200                                 | 200           |
| L-cysteine             | 3                                   | 3             |
| Corn flour             | 397                                 | 72.8          |
| Maltodextrin           | 132                                 | 100           |
| Cane sugar             | 100                                 | 172.8         |
| Cellulose              | 50                                  | 50            |
| Soybean oil            | 70                                  | 25            |
| Tert-Butylhydroquinone | 0.014                               | 25            |
| Lard                   | 0                                   | 177.5         |
| Mineral blend          | 35                                  | 10            |
| Dicalcium phosphate    | 0                                   | 13            |
| Calcium carbonate      | 0                                   | 5.5           |
| Potassium tartrate     | 0                                   | 16.5          |
| Vitamine               | 10                                  | 10            |
| Choline bitartrate     | 2.5                                 | 2             |
| FD&C Red Dye           | 0                                   | 0.05          |

2
